# Supplementary material for: Plasma-Derived Exosomal hsa-miR-4488 and hsa-miR-1228-5p: Novel Biomarkers for Dermatomyositis-Associated Interstitial Lung Disease with Anti-Melanoma Differentiation-Associated Protein 5 Antibody-Positive Subset
Source: Biomed Res Int. 2021 Jul 28;2021:6676107. doi: 10.1155/2021/6676107 (PMC8342150; doi:10.1155/2021/6676107)
Supplement: Supplementary Materials — Table S1. All differentially expressed miRNAs in HC versus DM-ILD-MDA5 Ab (+). Table S2. All differentially expressed miRNAs in DM-nonILD-MSA16 (-) versus DM-ILD-MDA5 Ab (+). Table S3. All differentially expressed miRNAs in HC versus DM-nonILD-MSA16 (-). [file 6676107.f1.zip]

Archive with 4 entries (3 files):
- 6676107.f1/Table S1.xlsx
- 6676107.f1/Table S2.xlsx
- 6676107.f1/Table S3.xlsx
- 6676107.f1/
