# Supplementary material for: Plasma-Derived Exosomal hsa-miR-4488 and hsa-miR-1228-5p: Novel Biomarkers for Dermatomyositis-Associated Interstitial Lung Disease with Anti-Melanoma Differentiation-Associated Protein 5 Antibody-Positive Subset
Source: Biomed Res Int. 2021 Jul 28;2021:6676107. doi: 10.1155/2021/6676107 (PMC8342150; doi:10.1155/2021/6676107)
Supplement: Supplementary Materials — Table S1. All differentially expressed miRNAs in HC versus DM-ILD-MDA5 Ab (+). Table S2. All differentially expressed miRNAs in DM-nonILD-MSA16 (-) versus DM-ILD-MDA5 Ab (+). Table S3. All differentially expressed miRNAs in HC versus DM-nonILD-MSA16 (-). [file 6676107.f1.zip › 6676107.f1/Table S1.xlsx]

## Sheet: Table S1
Table S1. All differentially expressed miRNAs in HC versus DM-ILD-MDA5 Ab (+)
miRNA_ID	HC1	HC2	HC3	HC4	HC5	ILD1	ILD2	ILD3	ILD4	ILD5	HC	ILD	up/down	log2(foldchange)	P-value
hsa-miR-503-5p	11.7	8.52	11.28	16.31	18.36	65.8	22.98	107.16	114.52	17.52	13.234	65.596	up	2.3094	2.49e-05
hsa-miR-424-3p	40.11	57.2	68.58	74.67	34.01	235.28	202.89	379.87	269.74	17.19	54.914	220.994	up	2.0088	0.000136567
hsa-miR-3614-5p	16.15	11.48	19.96	14.59	7.02	36.93	79.96	51.7	29.34	19.55	13.84	43.496	up	1.652	0.000154983
hsa-miR-199a-5p	379.91	1026.43	361.11	774.21	878.91	31.09	20.74	94.03	316.58	101.1	684.114	112.708	down	-2.6016	0.000199416
hsa-miR-486-3p	200.54	134.2	685.75	199.13	509.1	3319.62	408.95	1514.94	1106.86	410.12	345.744	1352.1	up	1.9674	0.000244962
hsa-miR-4700-5p	0.56	0.37	2.6	0	0	12.86	3.92	5.63	1.89	1.35	0.706	5.13	up	2.8612	0.000315282
hsa-miR-27b-5p	12.26	24.06	28.65	24.03	10.26	1.29	1.49	5.22	7.1	1.35	19.852	3.29	down	-2.5931	0.000343592
hsa-miR-505-5p	2.23	2.59	11.28	2.57	4.32	118.75	1.31	23.71	7.1	4.38	4.598	31.05	up	2.7555	0.000391349
hsa-miR-133a-3p	12.26	105.14	74.65	74.67	15.66	1.87	3.18	12.72	8.99	11.12	56.476	7.576	down	-2.8981	0.000648173
hsa-miR-206	20.61	23.69	31.25	5.15	23.21	123.07	295.92	50.23	11.83	9.1	20.782	98.03	up	2.2379	0.000861561
hsa-miR-183-5p	47.91	78.67	80.73	57.51	89.62	207.46	72.49	402.51	282.04	59.65	70.888	204.83	up	1.5308	0.000990481
hsa-miR-6501-5p	3.34	14.07	7.81	3.43	6.48	24.43	38.11	20.09	11.36	10.78	7.026	20.954	up	1.5765	0.0010192
hsa-miR-889-3p	5.57	12.4	7.81	2.57	3.78	0	0	0.13	3.31	0	6.426	0.688	down	-3.2234	0.00115746
hsa-miR-182-5p	62.95	92.18	84.2	52.36	112.29	136.75	117.32	550.25	335.99	64.03	80.796	240.868	up	1.5759	0.00130615
hsa-miR-107	82.44	207.14	139.75	210.29	267.24	526.31	367.1	840.38	513.92	146.25	181.372	478.792	up	1.4004	0.00153
hsa-miR-4800-5p	0	0.56	0	0	0	2.1	0.37	2.28	1.42	1.68	0.112	1.57	up	3.8092	0.00157485
hsa-miR-6777-5p	0.56	0	0	0	0	9.35	0	0.94	1.42	1.68	0.112	2.678	up	4.5796	0.00158131
hsa-miR-6805-5p	3.9	3.7	0.87	4.29	0	24.66	7.47	5.36	8.52	4.72	2.552	10.146	up	1.9912	0.00167207
hsa-miR-6802-5p	0.56	5.74	4.34	5.15	2.16	0.23	0	0.27	0.47	0.67	3.59	0.328	down	-3.4522	0.00177138
hsa-miR-5096	1.11	0.19	2.6	3.43	1.62	3.39	5.98	3.08	11.83	6.4	1.79	6.136	up	1.7773	0.00178082
hsa-miR-654-3p	38.44	41.28	23.44	37.77	15.12	2.69	2.24	6.3	14.67	8.76	31.21	6.932	down	-2.1707	0.00198065
hsa-miR-744-3p	2.79	1.67	2.6	2.57	1.62	0	0	0.67	0	0	2.25	0.134	down	-4.0696	0.00206046
hsa-miR-4306	0.56	2.22	1.74	0.86	1.08	4.79	3.36	6.03	3.79	2.36	1.292	4.066	up	1.654	0.00236817
hsa-miR-4436b-3p	0.56	2.04	1.74	0.86	0.54	0.12	0	0	0	0	1.148	0.024	down	-5.5799	0.00267549
hsa-miR-4504	0	0.37	0	0.86	0.54	4.44	1.12	3.48	5.21	0	0.354	2.85	up	3.0091	0.00281807
hsa-miR-6747-3p	0	0	0	0	0	7.25	0	2.54	0	0	0	1.958	up	7.6132	0.0029757
hsa-miR-4446-5p	1.11	2.59	0	2.57	0.54	0	0	0	0	0	1.362	0	down	-7.0896	0.00319057
hsa-miR-4732-5p	99.71	20.73	83.33	59.22	107.97	760.65	69.5	255.71	113.57	20.89	74.192	244.064	up	1.7179	0.00323255
hsa-miR-182-3p	0	0	0	0	0	0.23	0.75	2.14	2.84	0	0	1.192	up	6.8972	0.00325808
hsa-miR-194-5p	20.61	46.83	30.38	121.02	58.31	226.98	62.77	737.11	56.79	14.49	55.43	219.628	up	1.9863	0.00336866
hsa-miR-219a-2-3p	0.56	3.33	2.6	0.86	0	0	0	0	0	0	1.47	0	down	-7.1997	0.00336949
hsa-miR-1228-5p	37.88	42.39	54.69	33.47	35.63	51.54	277.99	40.99	31.23	105.82	40.812	101.514	up	1.3146	0.00341103
hsa-miR-6891-5p	0	0	0	1.72	0.54	5.73	15.51	6.3	0	0	0.452	5.508	up	3.6071	0.0034784
hsa-miR-1284	0	0	0	0	0	3.62	0	6.16	0	0	0	1.956	up	7.6118	0.00366868
hsa-miR-1285-3p	187.73	288.03	267.36	145.06	268.86	325.62	341.88	406.12	868.36	399.67	231.408	468.33	up	1.0171	0.00368588
hsa-miR-887-3p	1.11	4.07	1.74	2.57	3.78	0	0.56	0.54	0	0	2.654	0.22	down	-3.5926	0.00373284
hsa-miR-6815-5p	2.79	2.22	2.6	1.72	1.62	14.26	5.6	3.08	6.15	2.02	2.19	6.222	up	1.5064	0.00373758
hsa-miR-381-3p	110.85	96.63	72.92	193.98	37.25	6.55	11.77	12.06	61.05	29.99	102.326	24.284	down	-2.0751	0.0039543
hsa-miR-487b-3p	2.23	4.81	0	2.57	2.16	0	0	0.54	0	0	2.354	0.108	down	-4.446	0.00398504
hsa-miR-4658	2.23	0.74	1.74	1.72	0	7.6	11.02	4.69	0.47	1.68	1.286	5.092	up	1.9853	0.00401506
hsa-miR-766-3p	6.13	5.74	13.02	18.88	14.58	0.82	0	3.48	4.73	1.35	11.67	2.076	down	-2.4909	0.00401745
hsa-miR-4508	1002.7	1215.24	550.34	586.24	973.93	576.22	4394.17	341.57	3541.58	3670.5	865.69	2504.81	up	1.5328	0.00407705
hsa-miR-3187-3p	15.04	16.29	22.57	10.3	7.02	16.6	42.22	12.59	35.96	41.45	14.244	29.764	up	1.0632	0.00450277
hsa-miR-146a-5p	12650.1	20250	23556.1	38096.9	10494	1249.21	2835.54	8803.41	8233.56	4933.54	21009.4	5211.05	down	-2.0114	0.0046552
hsa-miR-1303	2.79	0.37	10.42	9.44	1.08	13.09	5.79	14.33	56.31	3.37	4.82	18.578	up	1.9465	0.00467834
hsa-miR-181d-5p	154.86	83.67	144.1	169.95	104.73	11.92	34.37	34.16	80.92	21.23	131.462	36.52	down	-1.8479	0.0048053
hsa-miR-4732-3p	55.15	23.88	81.6	16.31	39.41	104.14	123.11	105.55	79.03	32.69	43.27	88.904	up	1.0389	0.00548876
hsa-miR-1273a	0	2.78	3.47	1.72	3.78	7.95	3.74	4.69	9.46	6.07	2.35	6.382	up	1.4413	0.00551278
hsa-miR-181c-3p	48.46	57.2	41.67	52.36	28.07	2.57	11.77	14.33	26.5	5.39	45.552	12.112	down	-1.9111	0.00559824
hsa-miR-92b-5p	28.97	77.01	61.63	16.31	37.79	205.24	64.27	50.5	74.3	62.34	44.342	91.33	up	1.0424	0.0062833
hsa-miR-330-3p	537	340.79	1105.02	748.46	499.92	105.66	42.41	156.05	244.65	231.18	646.238	155.99	down	-2.0506	0.00629493
hsa-miR-501-3p	293.57	265.26	482.63	439.46	360.09	439.23	720.75	1567.05	864.1	182.99	368.202	754.824	up	1.0356	0.00714591
hsa-miR-431-5p	15.04	25.17	4.34	17.17	16.2	0.94	0	1.34	5.21	6.4	15.584	2.778	down	-2.4879	0.00720037
hsa-miR-363-5p	10.58	22.77	17.36	3.43	16.74	56.1	21.3	26.79	41.64	10.78	14.176	31.322	up	1.1437	0.00771422
hsa-miR-3190-3p	27.3	15.55	35.59	15.45	30.23	2.92	5.79	3.62	6.63	10.78	24.824	5.948	down	-2.0613	0.00864968
hsa-miR-451b	2.23	0.93	1.74	0	0.54	2.1	3.36	8.04	4.73	0.67	1.088	3.78	up	1.7967	0.00893048
hsa-miR-1269b	0	0	0	0	0	0	8.97	0	0.47	0	0	1.888	up	7.5607	0.00927339
hsa-miR-551b-5p	1.11	0.37	4.34	2.57	4.86	0	0	0.4	0.47	0.67	2.65	0.308	down	-3.105	0.00957557
hsa-miR-4488	1.11	13.33	7.81	5.15	6.48	7.83	33.81	4.96	18.46	17.52	6.776	16.516	up	1.2854	0.0098557
