# Supplementary material for: Plasma-Derived Exosomal hsa-miR-4488 and hsa-miR-1228-5p: Novel Biomarkers for Dermatomyositis-Associated Interstitial Lung Disease with Anti-Melanoma Differentiation-Associated Protein 5 Antibody-Positive Subset
Source: Biomed Res Int. 2021 Jul 28;2021:6676107. doi: 10.1155/2021/6676107 (PMC8342150; doi:10.1155/2021/6676107)
Supplement: Supplementary Materials — Table S1. All differentially expressed miRNAs in HC versus DM-ILD-MDA5 Ab (+). Table S2. All differentially expressed miRNAs in DM-nonILD-MSA16 (-) versus DM-ILD-MDA5 Ab (+). Table S3. All differentially expressed miRNAs in HC versus DM-nonILD-MSA16 (-). [file 6676107.f1.zip › 6676107.f1/Table S2.xlsx]

## Sheet: Table S2
Table S2. All differentially expressed miRNAs in DM-nonILD-MSA16 (-) versus DM-ILD-MDA5 Ab (+)																															Table S1. All differentially expressed miRNAs in HC versus DM-ILD-MDA5 Ab (+)																Table S1. All differentially expressed miRNAs in HC versus DM-ILD-MDA5 Ab (+)
miRNA_ID	nonILD1	nonILD2	nonILD3	nonILD4	nonILD5	ILD1	ILD2	ILD3	ILD4	ILD5	nonILD	ILD	up/down	log2(foldchange)	P-value
hsa-miR-4488	2.15	0	0	0.48	2.03	7.83	33.81	4.96	18.46	17.52	0.932	16.516	up	4.1474	7.79e-07
hsa-miR-6821-5p	0.31	0	0	0.48	0	3.74	15.51	3.62	3.31	2.02	0.158	5.64	up	5.1577	3.22e-06
hsa-miR-3614-5p	15.02	6.51	5.64	7.15	9.11	36.93	79.96	51.7	29.34	19.55	8.686	43.496	up	2.3241	1.01e-05
hsa-miR-136-3p	16.86	17.9	38.47	9.29	3.04	0.82	0.56	1.61	1.42	0	17.112	0.882	down	-4.2781	1.2e-05
hsa-miR-1228-5p	10.11	4.88	3.98	6.19	33.42	51.54	277.99	40.99	31.23	105.82	11.716	101.514	up	3.1151	1.8e-05
hsa-miR-4516	0.31	0	0.33	0.71	0	1.64	3.92	1.21	8.52	4.72	0.27	4.002	up	3.8897	2.82e-05
hsa-miR-6891-5p	0	0	0	0	0	5.73	15.51	6.3	0	0	0	5.508	up	9.1054	3.21e-05
hsa-miR-381-3p	302.49	455.54	498.14	143.86	30.38	6.55	11.77	12.06	61.05	29.99	286.082	24.284	down	-3.5584	3.5e-05
hsa-miR-133a-3p	217.6	675.17	37.81	27.39	10.13	1.87	3.18	12.72	8.99	11.12	193.62	7.576	down	-4.6756	4.15e-05
hsa-miR-4449	0	0	0	0.24	0	0.58	3.36	3.21	2.37	1.35	0.048	2.174	up	5.5012	5.05e-05
hsa-miR-4508	942.41	266.81	133.99	228.41	586.31	576.22	4394.17	341.57	3541.58	3670.5	431.586	2504.81	up	2.537	0.000107051
hsa-miR-483-5p	78.76	29.28	44.77	65.02	66.83	90.7	282.28	118.68	261.69	213.32	56.932	193.334	up	1.7638	0.000130953
hsa-miR-6750-5p	9.81	4.88	5.97	6.67	6.08	25.36	15.51	20.09	24.13	17.52	6.682	20.522	up	1.6188	0.000177332
hsa-miR-1273g-3p	1.84	0	0	0.48	0	6.9	6.54	5.36	3.79	0.67	0.464	4.652	up	3.3257	0.00018248
hsa-miR-4466	2.15	0	0.66	1.67	3.04	7.71	13.26	1.47	8.52	14.83	1.504	9.158	up	2.6062	0.00018831
hsa-miR-4658	0.61	0	0.33	0.71	1.01	7.6	11.02	4.69	0.47	1.68	0.532	5.092	up	3.2587	0.000219547
hsa-miR-4741	2.76	1.63	0.66	3.33	2.03	7.48	9.9	3.62	17.04	6.4	2.082	8.888	up	2.0939	0.000244825
hsa-miR-654-3p	42.91	74.84	95.52	45.02	10.13	2.69	2.24	6.3	14.67	8.76	53.684	6.932	down	-2.9531	0.000283887
hsa-miR-199a-5p	545.83	1430.06	929.29	396.57	474.92	31.09	20.74	94.03	316.58	101.1	755.334	112.708	down	-2.7445	0.000339802
hsa-miR-3960	3.06	0	1.99	0.71	8.1	7.71	21.3	4.82	16.56	33.36	2.772	16.75	up	2.5952	0.000354626
hsa-miR-133b	17.78	66.7	4.64	3.33	2.03	0.47	0.56	1.61	0.47	1.68	18.896	0.958	down	-4.3019	0.000432181
hsa-miR-7-1-3p	0.92	3.25	4.31	1.91	0	0	0	0.13	0	0	2.078	0.026	down	-6.3205	0.000553441
hsa-miR-3187-3p	14.1	9.76	3.65	14.77	6.08	16.6	42.22	12.59	35.96	41.45	9.672	29.764	up	1.6217	0.000625781
hsa-miR-1273f	2.45	0	0.66	0.24	1.01	10.05	5.04	2.01	3.31	4.38	0.872	4.958	up	2.5074	0.000630458
hsa-miR-4669	0.92	16.27	1.66	0.95	3.04	2.69	97.71	1.74	120.67	2.02	4.568	44.966	up	3.2992	0.000636062
hsa-miR-3656	34.33	26.03	12.93	8.81	50.63	82.75	85	24.11	118.31	103.12	26.546	82.658	up	1.6387	0.000736367
hsa-miR-4700-5p	2.15	0	1.33	0.24	0	12.86	3.92	5.63	1.89	1.35	0.744	5.13	up	2.7856	0.000766976
hsa-miR-4727-3p	0	0	0.66	0	0	1.99	1.49	0.94	1.89	1.35	0.132	1.532	up	3.5368	0.000772114
hsa-miR-1273e	0.61	0	0.66	0	1.01	1.99	2.8	1.61	5.21	2.7	0.456	2.862	up	2.6499	0.000811788
hsa-miR-4657	12.57	3.25	2.98	6.19	13.16	23.03	41.47	14.47	12.78	32.69	7.63	24.888	up	1.7057	0.000903012
hsa-miR-1908-5p	148.95	229.39	28.52	115.99	161.01	186.07	231.66	156.58	306.17	1460.52	136.772	468.2	up	1.7754	0.000943265
hsa-miR-766-3p	8.89	47.18	14.59	6.19	15.19	0.82	0	3.48	4.73	1.35	18.408	2.076	down	-3.1485	0.00105152
hsa-miR-320e	6.44	6.51	7.3	12.15	15.19	12.39	31.57	21.7	22.24	43.13	9.518	26.206	up	1.4612	0.00107049
hsa-miR-146b-5p	2420.55	5363.93	10970.7	3050.85	2551.81	583.35	277.8	1472.21	839.97	652.08	4871.56	765.082	down	-2.6707	0.00109672
hsa-miR-889-3p	3.06	8.13	10.61	7.38	6.08	0	0	0.13	3.31	0	7.052	0.688	down	-3.3576	0.00113753
hsa-miR-4440	5.21	1.63	2.32	2.62	4.05	4.91	12.52	7.37	18.93	6.4	3.166	10.026	up	1.663	0.00115741
hsa-miR-1185-1-3p	1.84	3.25	6.96	2.86	0	0	0	0.27	0.47	0	2.982	0.148	down	-4.3326	0.00140839
hsa-miR-146a-3p	26.36	47.18	20.23	22.63	7.09	0	1.31	6.03	5.21	0	24.698	2.51	down	-3.2986	0.00141333
hsa-miR-193a-5p	2079.44	312.37	251.72	1444.8	1276.92	793.85	9028.58	2016.71	4677.78	3199.73	1073.05	3943.33	up	1.8777	0.0015238
hsa-miR-937-3p	1.53	0	0	1.91	1.01	5.03	4.48	3.62	4.26	2.02	0.89	3.882	up	2.1249	0.00155504
hsa-miR-4701-5p	0.31	6.51	1.33	0.24	4.05	0	0	0	0	0	2.488	0	down	-7.9588	0.00158446
hsa-miR-6501-5p	6.13	1.63	0.66	4.29	15.19	24.43	38.11	20.09	11.36	10.78	5.58	20.954	up	1.9089	0.00160804
hsa-miR-6753-3p	0	0	0	0.24	0	2.81	2.06	1.88	0.47	0	0.048	1.444	up	4.9109	0.00167738
hsa-miR-4683	0	0	0	0.24	0	0.35	2.99	3.62	1.42	0	0.048	1.676	up	5.1258	0.0020408
hsa-miR-320c	972.76	902.94	634.12	1364.53	2332.07	2123.47	3428.31	2392.03	2890.9	3376.98	1241.28	2842.34	up	1.1952	0.00211566
hsa-miR-4685-3p	6.13	1.63	0.99	4.53	5.06	5.84	13.45	8.17	17.98	9.1	3.668	10.908	up	1.5723	0.00212386
hsa-miR-146a-5p	36469.8	28570.2	45523.4	21019.4	6811.92	1249.21	2835.54	8803.41	8233.56	4933.54	27678.9	5211.05	down	-2.4091	0.00222443
hsa-miR-500a-5p	1.84	3.26	1.32	1.42	4.06	0	0	0	0.94	0	2.38	0.188	down	-3.6622	0.00224839
hsa-miR-140-3p	16806.9	18258.8	21180.2	8683.8	6175.99	1832.44	1520.71	3890.76	6000.91	1761.45	14221.1	3001.25	down	-2.2444	0.00234646
hsa-miR-342-3p	34.63	180.59	135.65	68.6	86.07	11.92	13.82	34.02	20.82	5.73	101.108	17.262	down	-2.5502	0.00247822
hsa-miR-1224-5p	13.18	4.88	26.2	8.57	58.73	230.95	37.92	43.26	60.57	25.95	22.312	79.73	up	1.8373	0.00262727
hsa-miR-320d	163.66	130.15	80.59	196.26	315.94	344.21	418.47	373.18	375.74	402.03	177.32	382.726	up	1.11	0.00290659
hsa-miR-92b-5p	25.13	34.17	9.29	41.44	71.9	205.24	64.27	50.5	74.3	62.34	36.386	91.33	up	1.3277	0.0032505
hsa-miR-744-3p	1.23	8.13	1.99	0.71	3.04	0	0	0.67	0	0	3.02	0.134	down	-4.4942	0.00325828
hsa-miR-377-3p	5.21	8.13	3.98	2.38	0	0	0.56	0.67	0	0	3.94	0.246	down	-4.0015	0.00333796
hsa-miR-4479	3.98	1.63	0	1.91	1.01	1.52	14.39	3.35	8.99	4.72	1.706	6.594	up	1.9505	0.00349717
hsa-miR-27b-5p	15.63	17.9	17.58	9.05	18.23	1.29	1.49	5.22	7.1	1.35	15.678	3.29	down	-2.2526	0.00355783
hsa-miR-30d-3p	7.36	16.27	8.29	5.72	7.09	0.82	0.93	3.48	1.42	0.34	8.946	1.398	down	-2.6779	0.00367156
hsa-miR-2355-5p	0.92	1.63	1.99	1.19	0	0	0	0	0	0	1.146	0	down	-6.8405	0.00383387
hsa-miR-223-3p	111.25	748.38	480.23	166.73	171.13	7.13	13.45	58.4	174.15	49.54	335.544	60.534	down	-2.4707	0.00412626
hsa-miR-154-5p	1.53	4.88	4.31	0.48	0	0	0	0	0.47	0	2.24	0.094	down	-4.5747	0.00463086
hsa-miR-378e	5.82	0	2.98	1.67	8.1	0.58	17.75	5.36	26.5	38.42	3.714	17.722	up	2.2545	0.00465983
hsa-miR-125b-1-3p	5.82	0	0.99	2.86	10.13	13.44	44.28	15.94	9.94	1.01	3.96	16.922	up	2.0953	0.00497048
hsa-miR-574-5p	43.83	16.27	39.8	57.88	12.15	30.39	62.21	35.9	205.38	135.13	33.986	93.802	up	1.4647	0.00532724
hsa-miR-301b-3p	0.92	6.51	1.33	2.14	0	0	0	0	0.47	0	2.18	0.094	down	-4.5355	0.00538732
hsa-miR-320b	6171.82	4526.07	4225.57	8066.44	16904.7	12720.8	22116.2	9391.83	15783.3	27257.2	7978.93	17453.9	up	1.1293	0.00550629
hsa-miR-514a-3p	3.37	0	0	5	0	0	0	0.13	0	0	1.674	0.026	down	-6.0086	0.00615155
hsa-miR-363-5p	10.42	14.64	8.29	16.91	23.29	56.1	21.3	26.79	41.64	10.78	14.71	31.322	up	1.0904	0.00636023
hsa-miR-6516-5p	4.9	13.02	8.29	7.15	3.04	0.12	0.75	2.01	3.31	0.67	7.28	1.372	down	-2.4077	0.00643761
hsa-miR-410-3p	9.81	19.52	20.23	5.95	4.05	0	0.19	0.8	4.26	3.37	11.912	1.724	down	-2.7886	0.00664266
hsa-miR-6513-5p	1.84	4.88	8.95	2.38	0	0.58	0	0.4	0.47	0	3.61	0.29	down	-3.6379	0.0075209
hsa-miR-1271-5p	3.68	19.52	16.91	6.43	2.03	0	0.56	2.81	2.84	1.01	9.714	1.444	down	-2.75	0.00769764
hsa-miR-1273a	4.9	0	2.32	3.1	0	7.95	3.74	4.69	9.46	6.07	2.064	6.382	up	1.6286	0.00783069
hsa-miR-6829-5p	1.53	0	0	0.24	0	0.12	1.68	0.67	8.52	5.05	0.354	3.208	up	3.1799	0.008154
hsa-miR-486-3p	315.36	336.77	200.32	1260.45	676.43	3319.62	408.95	1514.94	1106.86	410.12	557.866	1352.1	up	1.2772	0.00833509
hsa-miR-619-5p	15.63	3.25	7.96	6.67	10.13	10.52	11.77	6.7	32.65	49.54	8.728	22.236	up	1.3492	0.00874853
hsa-miR-885-5p	0.61	0	0	0.24	0	1.64	3.36	2.41	0	0	0.17	1.482	up	3.1239	0.00888874
hsa-miR-4443	1.53	0	0.66	1.19	2.03	4.44	2.24	1.34	3.31	5.39	1.082	3.344	up	1.6279	0.00892296
hsa-miR-624-5p	1.23	3.25	4.64	0.24	0	0.12	0	0.27	0	0	1.872	0.078	down	-4.585	0.00896751
hsa-miR-125b-5p	358.89	152.92	107.13	316.06	158.98	228.62	1233.2	1000.85	218.62	66.72	218.796	549.602	up	1.3288	0.00938081
hsa-miR-411-5p	0.31	6.51	8.29	1.43	8.1	0.47	0.37	1.21	0	0.34	4.928	0.478	down	-3.3659	0.00942434
hsa-miR-6815-5p	3.68	1.63	3.65	2.62	0	14.26	5.6	3.08	6.15	2.02	2.316	6.222	up	1.4257	0.0096018
hsa-miR-376c-3p	1.23	3.25	1.66	1.43	0	0	0	0.27	0	0	1.514	0.054	down	-4.8093	0.00970302
hsa-miR-1290	133.93	42.3	74.95	197.69	45.57	180.23	351.59	377.2	110.26	79.19	98.888	219.694	up	1.1516	0.00975122
