# Supplementary material for: Plasma-Derived Exosomal hsa-miR-4488 and hsa-miR-1228-5p: Novel Biomarkers for Dermatomyositis-Associated Interstitial Lung Disease with Anti-Melanoma Differentiation-Associated Protein 5 Antibody-Positive Subset
Source: Biomed Res Int. 2021 Jul 28;2021:6676107. doi: 10.1155/2021/6676107 (PMC8342150; doi:10.1155/2021/6676107)
Supplement: Supplementary Materials — Table S1. All differentially expressed miRNAs in HC versus DM-ILD-MDA5 Ab (+). Table S2. All differentially expressed miRNAs in DM-nonILD-MSA16 (-) versus DM-ILD-MDA5 Ab (+). Table S3. All differentially expressed miRNAs in HC versus DM-nonILD-MSA16 (-). [file 6676107.f1.zip › 6676107.f1/Table S3.xlsx]

## Sheet: Table S3
Table S3. All differentially expressed miRNAs in HC versus DM-nonILD-MSA16 (-)																															Table S1. All differentially expressed miRNAs in DM-nonILD-MSA16 (-) versus DM-ILD-MDA5 Ab (+)																Table S1. All differentially expressed miRNAs in DM-nonILD-MSA16 (-) versus DM-ILD-MDA5 Ab (+)
miRNA_ID	HC1	HC2	HC3	HC4	HC5	nonILD1	nonILD2	nonILD3	nonILD4	nonILD5	HC	nonILD	up/down	log2(foldchange)	P-value
hsa-miR-625-3p	56.26	114.77	176.21	71.24	38.33	222.2	881.79	796.96	1166.13	82.02	91.362	629.82	up	2.7853	4.5e-06
hsa-miR-500a-5p	0	0	0	0	0	1.84	3.26	1.32	1.42	4.06	0	2.38	up	7.8948	5.43e-05
hsa-miR-29a-3p	52.92	61.64	62.5	114.16	70.72	194.31	437.64	866.94	174.35	81.01	72.388	350.85	up	2.277	0.000115287
hsa-miR-32-5p	0.56	2.78	0.87	0.86	4.86	3.68	19.52	14.59	13.81	9.11	1.986	12.142	up	2.6121	0.000188537
hsa-miR-503-5p	11.7	8.52	11.28	16.31	18.36	35.55	22.78	94.19	86.22	29.37	13.234	53.622	up	2.0186	0.000227738
hsa-miR-641	0	1.67	0.87	0.86	0.54	7.05	6.51	4.97	0.48	15.19	0.788	6.84	up	3.1177	0.000371822
hsa-miR-18a-5p	1.11	2.04	4.34	2.57	1.08	5.21	17.9	15.59	5.95	5.06	2.228	9.942	up	2.1578	0.000373478
hsa-miR-671-5p	42.34	168.26	90.28	62.66	105.81	25.44	19.52	7.63	16.91	47.59	93.87	23.418	down	-2.003	0.000461041
hsa-miR-548f-3p	0.56	0.93	3.47	1.72	1.08	1.84	11.38	12.93	10.24	4.05	1.552	8.088	up	2.3817	0.000470434
hsa-miR-377-3p	0	0.19	0	0.86	0.54	5.21	8.13	3.98	2.38	0	0.318	3.94	up	3.6311	0.000542254
hsa-miR-134-5p	13822.2	24501.4	8545.01	6508.71	13910.3	6849.44	2671.39	2432.66	1814.45	4243.9	13457.5	3602.37	down	-1.9014	0.000585126
hsa-miR-491-5p	11.7	52.94	32.12	30.9	37.25	9.5	8.13	8.29	2.86	14.18	32.982	8.592	down	-1.9406	0.00067638
hsa-miR-1908-5p	298.02	1126.39	694.43	214.58	290.45	148.95	229.39	28.52	115.99	161.01	524.774	136.772	down	-1.9399	0.000728348
hsa-miR-148a-3p	24199.5	5935.15	16439	22035	7184.6	34179.2	74556.5	90174.6	73016.6	11451.8	15158.7	56675.7	up	1.9026	0.000865037
hsa-miR-342-5p	269.06	286.36	589.4	341.62	301.79	625.21	1205.54	1891.41	595.69	556.94	357.646	974.958	up	1.4468	0.000882156
hsa-miR-499a-5p	1.67	3.15	2.6	6.87	0.54	12.87	9.76	15.59	10	5.06	2.966	10.656	up	1.8451	0.0011387
hsa-miR-194-5p	20.61	46.83	30.38	121.02	58.31	196.14	143.17	234.48	216.03	102.27	55.43	178.418	up	1.6865	0.00117596
hsa-miR-548g-3p	0.56	0.19	0	0	0	0.31	3.25	4.64	2.14	3.04	0.15	2.676	up	4.157	0.00123799
hsa-miR-1284	0	0	0	0	0	0	3.25	1.66	6.43	0	0	2.268	up	7.8253	0.00128895
hsa-miR-582-3p	4.46	3.15	10.42	11.16	3.24	43.52	21.15	47.09	29.77	1.01	6.486	28.508	up	2.136	0.00128964
hsa-miR-4488	1.11	13.33	7.81	5.15	6.48	2.15	0	0	0.48	2.03	6.776	0.932	down	-2.862	0.00141026
hsa-miR-146b-5p	1087.37	1038.65	2045.98	1999.91	2054.21	2420.55	5363.93	10970.7	3050.85	2551.81	1645.22	4871.56	up	1.5661	0.00150432
hsa-miR-4753-5p	0.56	0.37	0.87	0	0.54	1.23	4.88	2.98	2.62	3.04	0.468	2.95	up	2.6561	0.0015129
hsa-miR-29c-3p	0.56	4.26	5.21	5.15	1.62	9.5	14.64	38.8	5	4.05	3.36	14.398	up	2.0993	0.00154156
hsa-miR-19a-3p	11.14	11.48	22.57	63.52	39.41	83.36	198.48	174.12	117.18	21.27	29.624	118.882	up	2.0047	0.00164504
hsa-miR-27a-3p	427.82	349.3	528.64	302.99	395.19	472.28	1270.62	1934.85	1168.27	516.44	400.788	1072.49	up	1.4201	0.00176522
hsa-miR-487a-5p	6.68	14.44	7.81	6.87	5.4	1.84	0	0.33	1.67	5.06	8.24	1.78	down	-2.2108	0.00182202
hsa-miR-6877-5p	140.38	168.45	158.85	61.8	127.41	64.36	34.17	19.57	44.3	55.69	131.378	43.618	down	-1.5907	0.00189077
hsa-miR-873-5p	1.11	3.15	4.34	1.72	0.54	10.42	4.88	9.62	16.2	1.01	2.172	8.426	up	1.9558	0.00218798
hsa-miR-548o-3p	11.14	6.3	32.98	15.44	17.28	20.22	110.64	57.7	49.06	22.28	16.628	51.98	up	1.6443	0.00219452
hsa-miR-581	0	0.37	0	0	0.54	0.92	8.13	2.65	0.48	3.04	0.182	3.044	up	4.064	0.00240325
hsa-miR-6821-5p	2.79	1.48	5.21	2.57	0.54	0.31	0	0	0.48	0	2.518	0.158	down	-3.9943	0.00242045
hsa-miR-3928-3p	103.61	217.13	201.39	103	193.27	75.7	30.91	27.53	33.35	94.17	163.68	52.332	down	-1.6451	0.00251864
hsa-miR-363-3p	233.96	229.54	313.36	309	402.2	542.77	559.66	941.23	602.36	826.3	297.612	694.464	up	1.2225	0.00252517
hsa-miR-16-5p	311.4	808.74	392.36	605.12	1180.16	797.15	1896.98	4267.69	1784.45	1430.83	659.556	2035.42	up	1.6258	0.00254302
hsa-miR-548av-3p	12.26	6.68	32.98	22.3	18.36	22.68	118.77	61.02	55.25	24.3	18.516	56.404	up	1.607	0.0025708
hsa-miR-605-3p	0	0.19	0	0	0	0.92	3.25	0.99	2.14	0	0.038	1.46	up	5.2638	0.00259566
hsa-miR-4516	2.23	3.52	0.87	0.86	5.94	0.31	0	0.33	0.71	0	2.684	0.27	down	-3.3134	0.00264632
hsa-miR-136-3p	3.34	9.81	4.34	3.43	0.54	16.86	17.9	38.47	9.29	3.04	4.292	17.112	up	1.9953	0.00270049
hsa-miR-30e-5p	491.32	620.3	867.17	843.74	1611.51	1520.74	4249.5	3965.22	2583.77	769.59	886.808	2617.76	up	1.5616	0.00318713
hsa-miR-142-5p	452.33	910	503.46	446.33	853	577.71	1804.25	3183.85	2322.97	916.42	633.024	1761.04	up	1.4761	0.00328191
hsa-miR-1228-5p	37.88	42.39	54.69	33.47	35.63	10.11	4.88	3.98	6.19	33.42	40.812	11.716	down	-1.8005	0.00338271
hsa-miR-548aq-3p	0	0.74	0	0	2.16	2.15	4.88	3.98	4.29	2.03	0.58	3.466	up	2.5791	0.00341359
hsa-miR-127-3p	11167.3	17354	6595.39	4381.77	5296.13	4328.37	3411.64	1682.13	1484.1	4435.29	8958.91	3068.31	down	-1.5459	0.00347249
hsa-miR-1273h-5p	286.88	300.43	511.28	181.11	256.44	119.53	191.98	42.45	116.95	135.69	307.228	121.32	down	-1.3405	0.00355423
hsa-let-7i-3p	3.34	2.22	0	3.43	1.62	7.97	6.51	16.25	4.29	5.06	2.122	8.016	up	1.9175	0.00390725
hsa-miR-3653-3p	0	0.37	0	1.72	0	8.89	1.63	9.29	0.95	0	0.418	4.152	up	3.3122	0.00391765
hsa-miR-514a-3p	0	0.19	0	0	0	3.37	0	0	5	0	0.038	1.674	up	5.4612	0.00417683
hsa-miR-182-5p	62.95	92.18	84.2	52.36	112.29	53.33	110.63	216.57	319.88	491.12	80.796	238.306	up	1.5605	0.00426165
hsa-miR-6842-3p	1145.86	753.02	674.47	387.11	409.76	253.15	556.4	145.26	154.34	268.35	674.044	275.5	down	-1.2908	0.00460452
hsa-miR-7851-3p	0.56	5.37	4.34	3.43	3.78	1.23	0	0.33	0.95	0	3.496	0.502	down	-2.7999	0.0049108
hsa-miR-484	415.01	139.02	578.12	499.55	321.22	557.17	2962.61	850.02	1385.02	255.18	390.584	1202	up	1.6217	0.0049243
hsa-miR-96-5p	2.79	11.11	7.81	3.43	6.48	4.29	14.64	37.81	12.62	30.38	6.324	19.948	up	1.6573	0.00499452
hsa-miR-301a-5p	0	0.56	0	0	1.08	0	6.51	5.64	1.67	2.03	0.328	3.17	up	3.2727	0.0050953
hsa-miR-410-3p	1.67	3.7	1.74	1.72	7.56	9.81	19.52	20.23	5.95	4.05	3.278	11.912	up	1.8615	0.00511128
hsa-miR-181a-5p	1604.32	2435.3	2600.66	2065.14	1821.52	2863.1	6615.02	5231.46	4690.24	2647	2105.39	4409.36	up	1.0665	0.00519768
hsa-miR-542-3p	1.67	2.96	2.6	6.01	5.4	11.03	14.64	20.89	11.91	2.03	3.728	12.1	up	1.6985	0.00550956
hsa-miR-23b-5p	67.4	35.17	111.11	53.22	21.59	26.36	34.17	6.63	21.2	12.15	57.698	20.102	down	-1.5212	0.0058866
hsa-miR-6827-5p	6.13	12.03	13.02	5.15	1.62	3.06	1.63	0.99	0.95	3.04	7.59	1.934	down	-1.9725	0.00592557
hsa-miR-4504	0	0.37	0	0.86	0.54	2.15	6.51	1.33	3.33	0	0.354	2.664	up	2.9118	0.00616334
hsa-miR-370-3p	4470.36	5118.82	1653.62	2171.57	4968.97	1614.52	1911.62	1475.85	505.66	1617.16	3676.67	1424.96	down	-1.3675	0.00651048
hsa-miR-130a-3p	14.48	20.55	12.15	28.32	14.04	47.2	109	41.46	38.35	12.15	17.908	49.632	up	1.4707	0.00659909
hsa-miR-642a-3p	2.23	2.22	8.68	6.01	4.86	5.82	9.76	14.59	23.82	9.11	4.8	12.62	up	1.3946	0.00689897
hsa-miR-155-5p	30.64	30.73	78.12	59.22	56.15	39.84	144.8	165.49	159.58	89.11	50.972	119.764	up	1.2324	0.0070173
hsa-miR-7-5p	1014.39	690.09	3060.72	1768.17	1497.06	2818.67	1607.4	5203.27	5808.96	2835.34	1606.09	3654.73	up	1.1862	0.00720423
hsa-miR-361-5p	17.83	18.88	21.7	27.47	19.98	29.73	87.85	56.05	48.59	22.28	21.172	48.9	up	1.2077	0.00738507
hsa-miR-760	496.34	520.71	670.13	281.53	432.98	148.95	440.89	142.61	216.74	164.04	480.338	222.646	down	-1.1093	0.00779004
hsa-miR-6727-5p	2.23	2.22	1.74	6.01	1.08	0.92	0	0	0.71	0	2.656	0.326	down	-3.0263	0.00816129
hsa-miR-421	7.8	7.03	8.68	6.87	15.12	7.66	52.06	31.84	34.54	9.11	9.1	27.042	up	1.5713	0.00818753
hsa-miR-424-3p	40.11	57.2	68.58	74.67	34.01	71.1	94.36	87.22	264.38	96.2	54.914	122.652	up	1.1593	0.00856861
hsa-miR-4665-5p	196.08	323.94	328.99	88.41	176.54	43.52	180.59	39.8	48.59	134.68	222.792	89.436	down	-1.3168	0.00909716
hsa-miR-4470	32.87	97.92	50.35	34.33	21.59	22.68	35.79	12.27	13.34	8.1	47.412	18.436	down	-1.3627	0.00966332
hsa-miR-3620-5p	3.9	7.4	6.08	3.43	2.7	0.31	0	2.32	2.14	0	4.702	0.954	down	-2.3012	0.00985442
